# Supplementary material for: Age-associated callus senescent cells produce TGF-β1 that inhibits fracture healing in aged mice
Source: PubMed Central journal article supplement (PMC9012290; doi:10.1172/jci148073), 2022-04-15
Supplement: jci-132-148073-s110.pdf [file jci-132-148073-s110.pdf]

**Supplemental Figures (10)**  
**Supplemental Tables (2)**

# Supplemental Figure 1

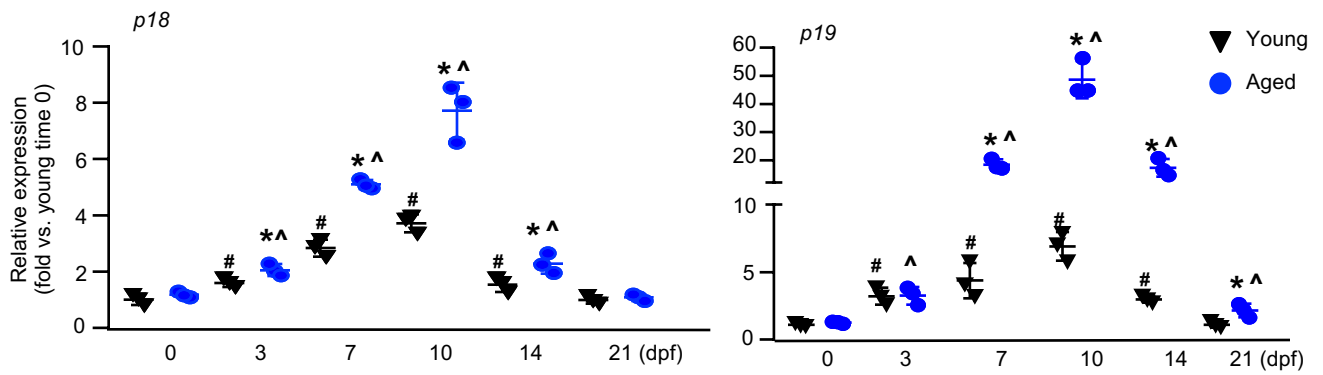

**Supplemental Figure 1. Increased senescent cells in fracture callus of aged mice.** Young and aged mice received tibial fracture surgery and were sacrificed on 3-, 7-, 10-, 14- and 21-dpf. (A) Expression levels of *p18* and *p19* mRNA in callus tissue examined by qPCR at the indicated time-points. n=3 mice/time-point. Relative expression is fold-change vs. young samples collected at time 0 as 1. Two-way ANOVA followed by Tukey post-hoc test. \*p<0.05 aged vs. young; #p<0.05 young vs. young-time 0 (non-fractured bone); ^p<0.05 aged vs. aged-time 0 (non-fractured bone).

## Supplemental Figure 2

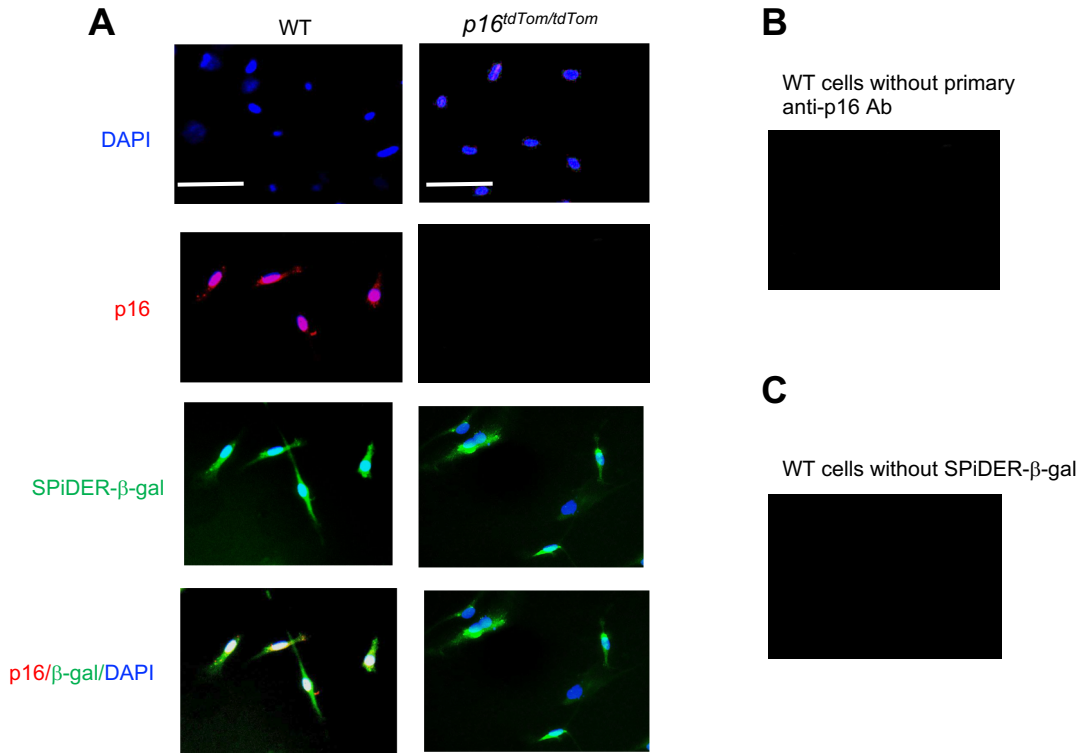

**Supplemental Figure 2. To demonstrate the specificity of anti-p16 Ab.** 3-m-old  $p16^{dtTom/dtTom}$  (p16-deficient) and WT control mice at 10 dpf were used to generate CaMPCs. Cells were cultured on cover slices and treated  $H_2O_2$  for 4 d to induce cellular senescence. (A) WT and  $p16^{dtTom/dtTom}$  cells stained with a rabbit anti-mouse P16 Ab, followed by a goat anti-rabbit Alexa Fluor 568 secondary Ab, and for Spider-β-gal staining with a senescence β-gal staining kit. (B) WT cells stained with a goat anti-rabbit Alexa Fluor 568 secondary Ab (without anti-p16 Ab). (C) WT cells stained with staining solution without addition of SPiDER-β-gal reagent. Scale bar=50 μm. n=4 wells. Repeated once.

# Supplemental Figure 3

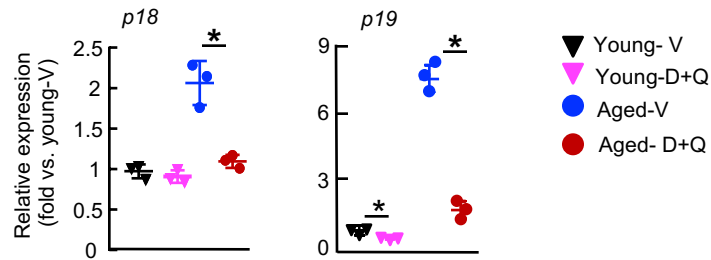

**Supplemental Figure 3. Senolytic drugs decrease the expression of senescence genes in callus tissues from aged mice.** Young and aged mice received tibial fracture surgery. Mice were given 5 mg/kg Dasatinib (D) + 50 mg/kg Quercetin (Q) or vehicle by gavage on 1-, 3-, 5-, and 7-dpf, and sacrificed at 10 dpf. Expression levels of *p18* and *p19* mRNA in callus tissues examined by qPCR. n=3 mice. Relative expression is fold-change vs. vehicle-treated young mice as 1. Two-way ANOVA followed by Tukey post-hoc test. \*p<0.05 vehicle vs. D+Q treatment.

# Supplemental Figure 4

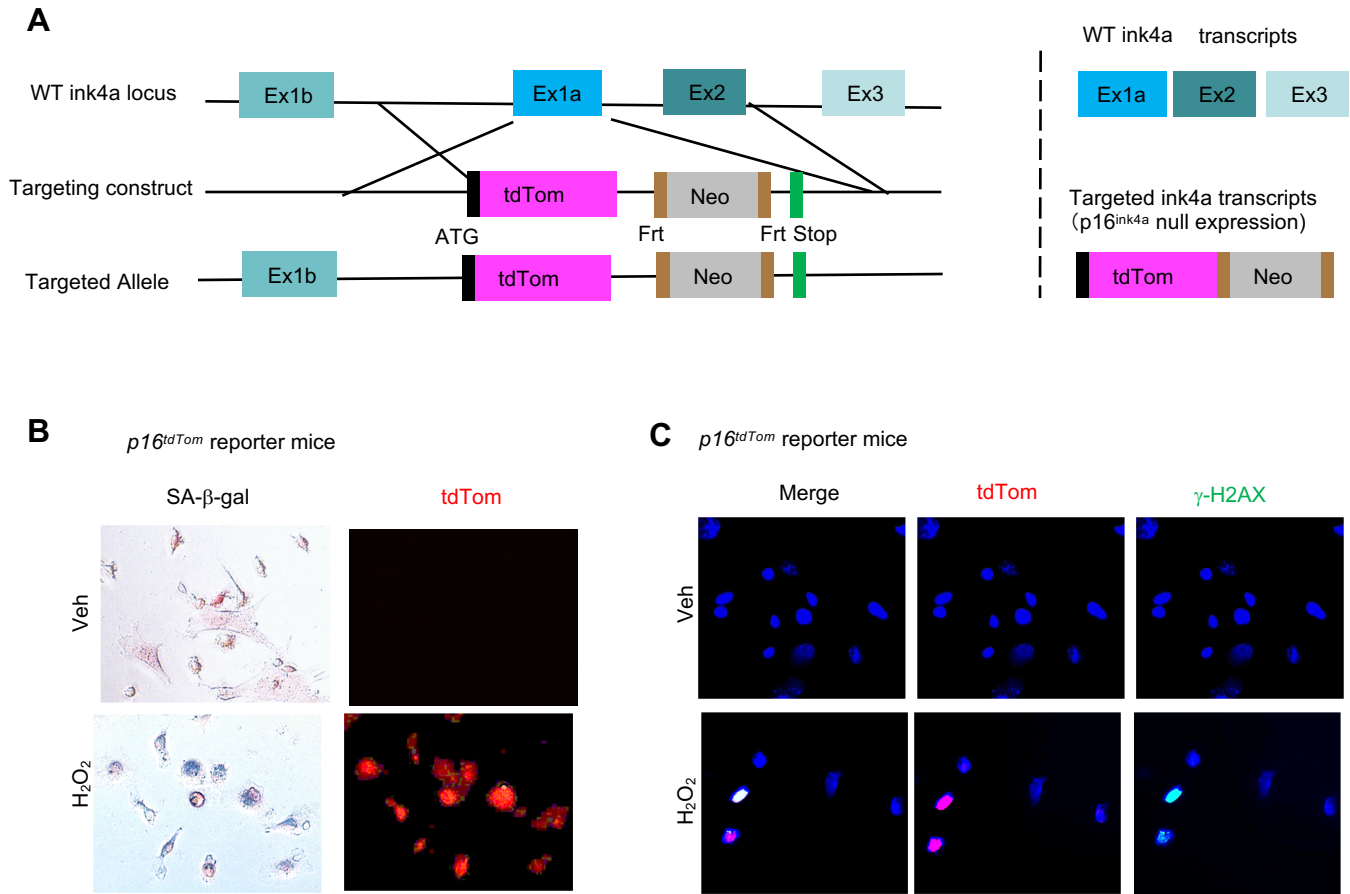

**Supplemental Figure 4. Characterization of callus senescent cells using *p16<sup>tdTom</sup>* reporter mice.** Callus from 3-m-old *p16<sup>tdTom</sup>* reporter mice 10 dpf were used to generate CaMPCs. (A) Schematic generation of *p16<sup>tdTom</sup>* mice. Mice carrying one targeting allele used as *p16<sup>tdTom</sup>* reporter mice. (B-C) 2<sup>nd</sup> passage of CaMPCs treated with vehicle (H<sub>2</sub>O) or H<sub>2</sub>O<sub>2</sub> for 4 d to induce cellular senescence. (B) SCs positive for tdTomato and SA-β-gal staining. (C) SCs positive for tdTomato and γ-H2AX staining. n=4 wells. Repeated once.

# Supplemental Figure 5

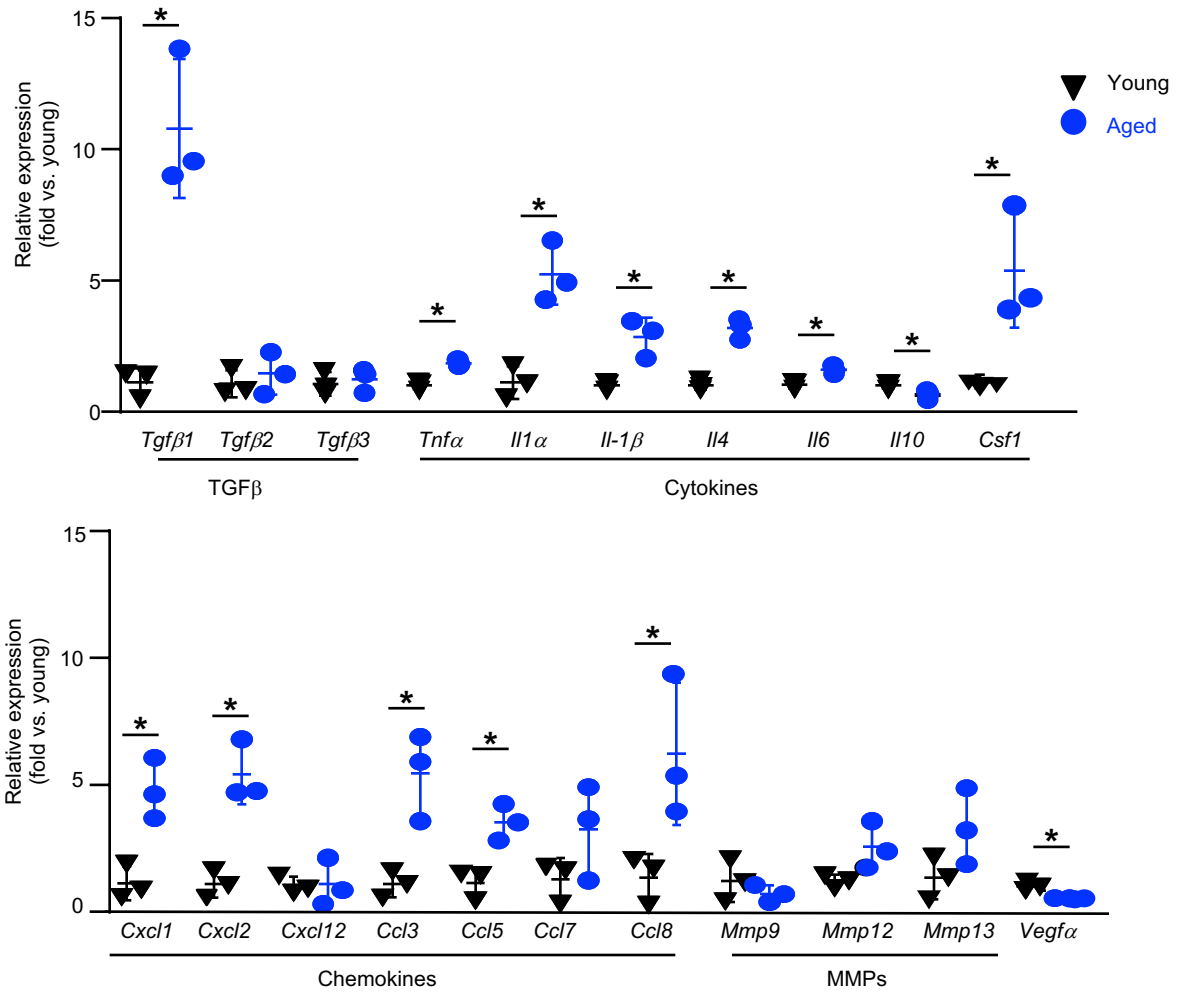

**Supplemental Figure 5. Senescent cells in aged callus express high levels of TGFβ1.** Young and aged mice were sacrificed at 10 dpf. Expression of SASP factors in callus tissues examined by qPCR. n=3 mice. Relative mRNA expression is the fold-change in aged samples vs. young samples as 1. Unpaired 2-tailed t-test, #p<0.05.

## Supplemental Figure 6

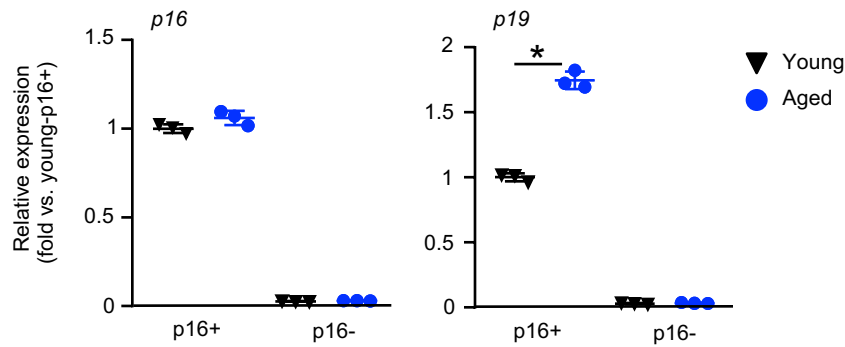

**Supplementary Figure 6. Isolation of p16 cells from primary callus of mice with bone fracture.** Young and aged mice received tibial fracture surgery and were sacrificed at 10 dpf. Callus tissues were cut into pieces and digested with Accumax cell detachment solution to generate cell suspensions. p16+ cells were isolated by indirect magnetic labeling. Callus cells were stained with a rabbit-anti mouse p16 Ab, followed by a PE conjugated anti-rabbit Ab. The cells were then incubated with anti-PE microbeads and passed through a MACS column to separate p16+ and p16- cells. Expression levels of the senescence genes, p16 and p19, measured by qPCR in p16+ and p16- cell populations. n=3 mice. Relative expression is the fold-change vs. p16+ cells isolated from young mice as 1. Unpaired 2-tailed t-tests. \*p<0.05.

# Supplemental Figure 7

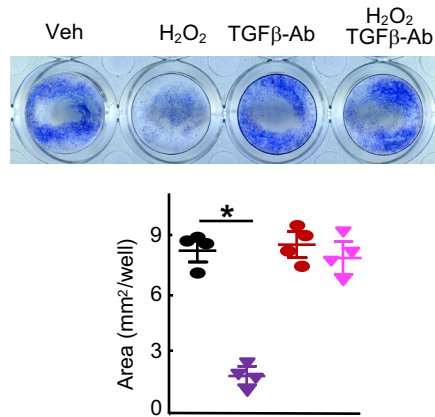

**Supplemental Figure 7. TGFβ neutralizing Ab blocks the inhibitory effects of H<sub>2</sub>O<sub>2</sub>-induced cell senescence on CaMPCs.** Callus pieces were treated with H<sub>2</sub>O<sub>2</sub> for 8 hr to induce cellular senescence and CM was collected. CaMPCs were treated with 30% CMs ± the TGFβ neutralizing Ab, 1D11, (1 μg/ml) or isotype IgG for 2 d. Cell growth assessed by methylene blue staining and positively-stained areas measured by Image J software. n=4 wells. Repeated once. One-way ANOVA followed by Tukey post-hoc test. \*p<0.05 vehicle vs. other treatment.



# Supplemental Figure 8

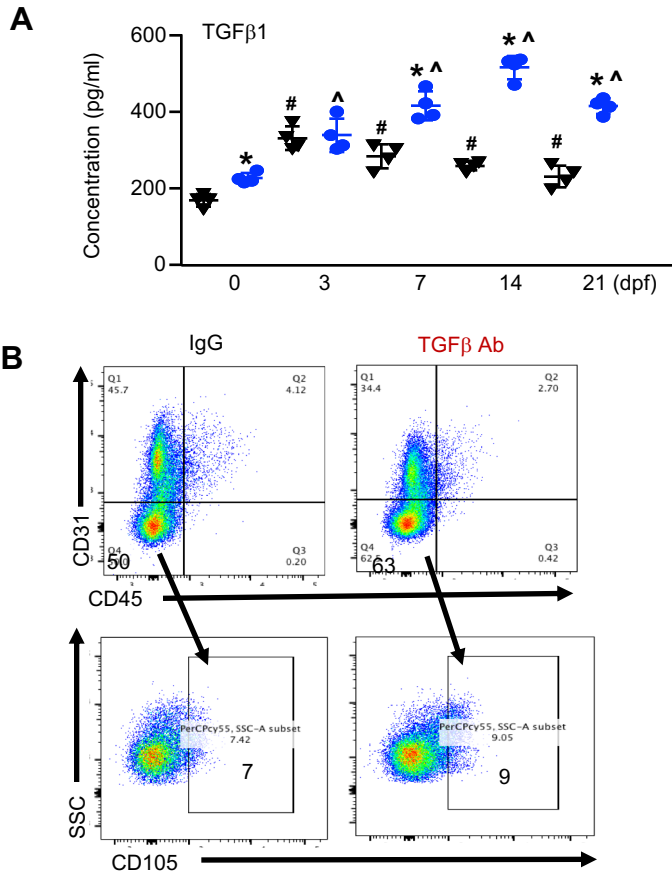

**Supplemental Figure 8. TGFβ neutralization enhances callus volume in aged mice.** (A) Young and aged mice received tibial fracture surgery. Concentration of active TGFβ1 protein in serum at indicated time-points measured by ELISA. n=4 mice. Two-way ANOVA followed by Tukey post-hoc test. \*p<0.05 aged vs. young; #p<0.05 young vs. young-time 0 (non-fractured bone); ^p<0.05 aged vs. aged-time 0 (non-fractured bone). (B) Callus MPCs identified as CD45-/CD31-/CD105+ cells by flow cytometry.

# Supplemental Figure 9

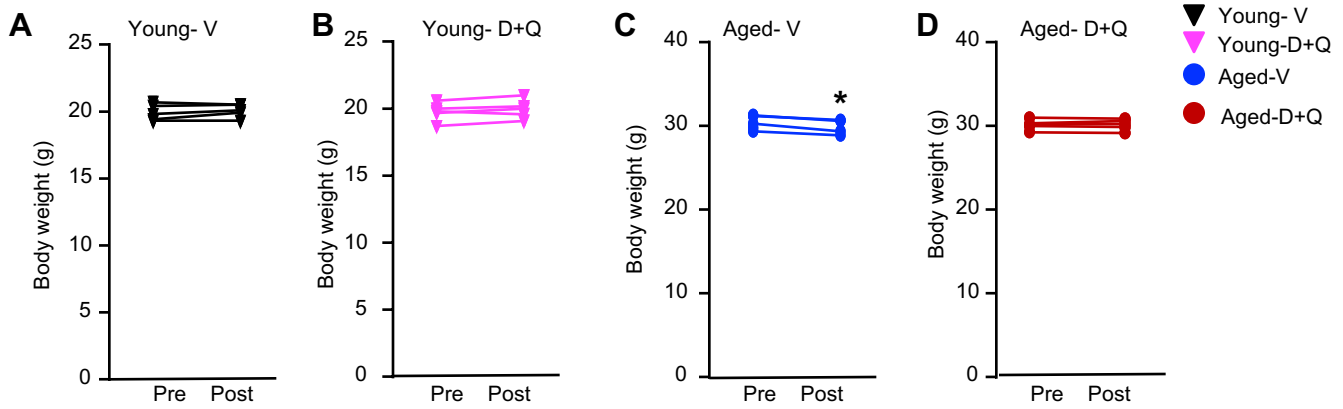

**Supplemental Figure 9. Dasatinib plus quercetin treatment has no effect on body weight in aged mice.** Young and aged female mice received tibial fracture surgery and treated with Dasatinib (D) plus Quercetin (Q), as indicated in Figure 8. Body weight was measured before and 14 dpf. (A-D) Body weight change pre- and post-treatment in young-V, Young- D+Q, Aged-V and Aged- D+Q group. Paired 2-tailed t-test. \* $p < 0.05$  vs. pre-treatment.  $n = 4-5$  mice.

# Supplemental Figure 10

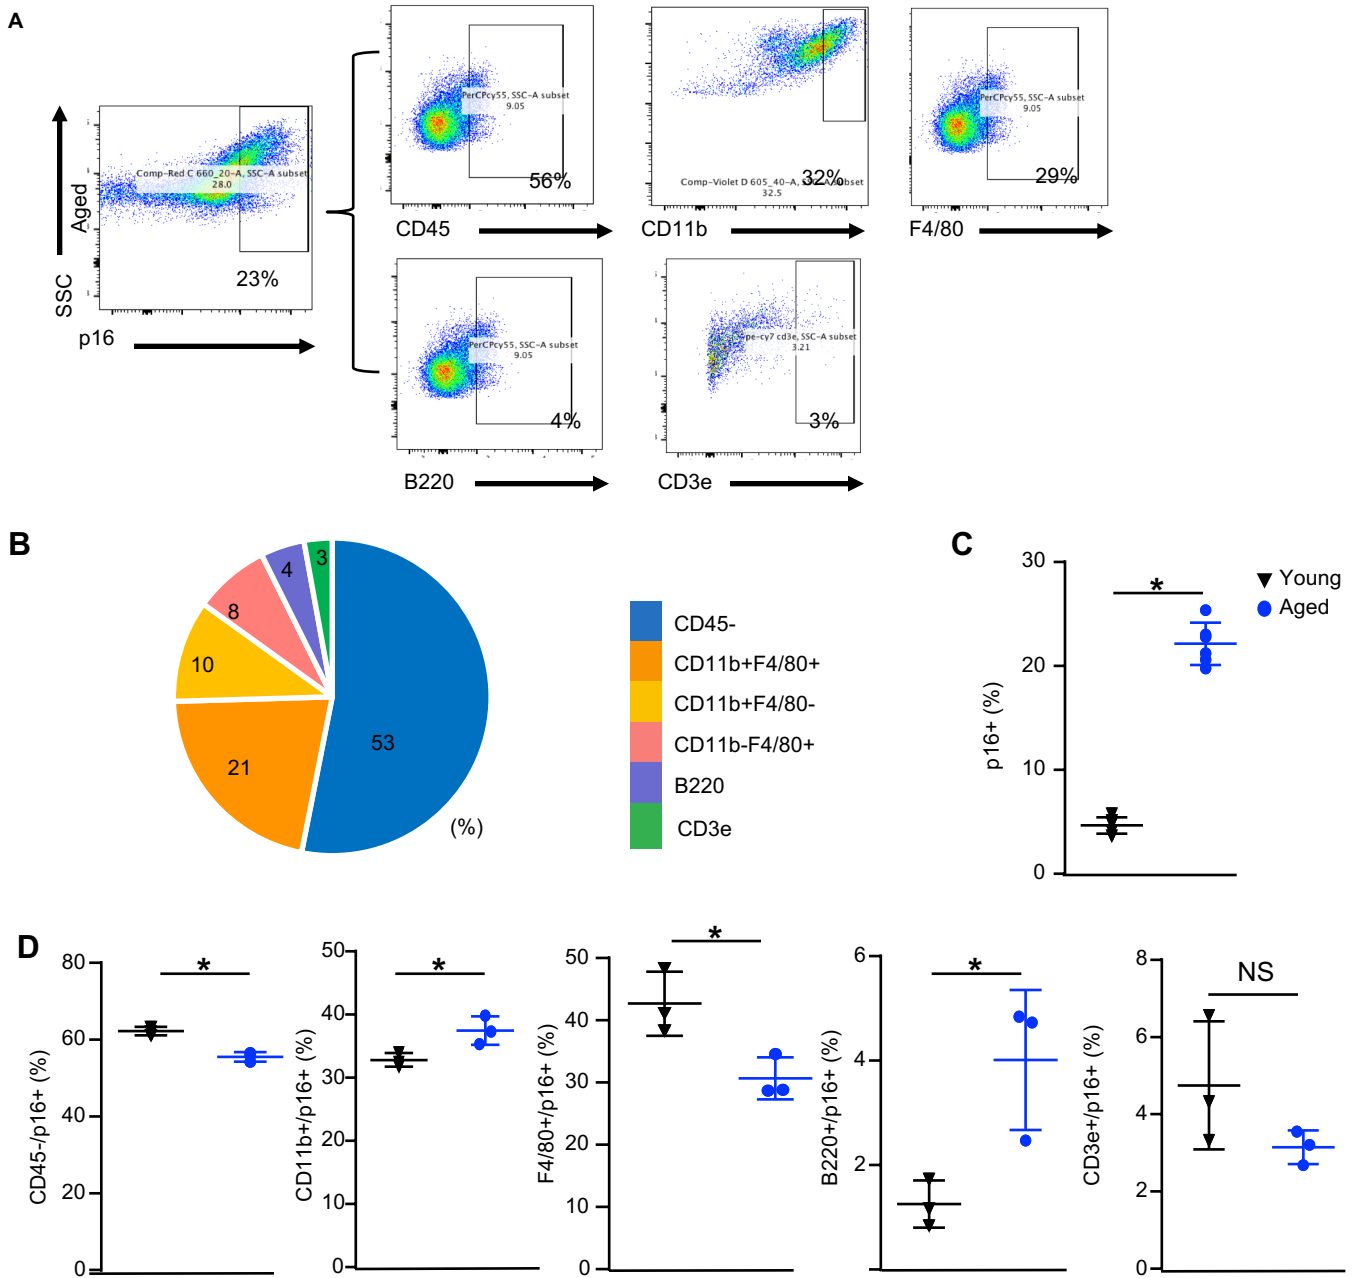

**Supplemental data 10. Callus SCs consist of cells from both mesenchymal and myeloid lineages.** Young and aged mice were sacrificed 10 dpf. Callus pieces were cultured for 2 d and subjected to flow cytometry. (A) p16+, CD45-, CD11b+, F4/80+, B220+ and CD3e+ cells from callus of aged mice identified by flow cytometry. (B) Relative percentage of CD45-, CD11b+F4/80+, CD11b+F4/80-, CD11b-F4/80+, B220+ and CD3e+ cells from callus of aged mice. (C) Percentage of p16+ cells. n=7 mice. (D) Percentage of CD45-, CD11b+, F4/80+, B220+ and CD3e+/p16+ cells from callus of aged mice versus young mice. n=3 mice. Statistical significance was calculated using a 2-tailed unpaired Student's t-test. "NS" means "not-significant". \*p<0.05.

# Supplemental table 1

**Supplemental Table 1. Antibodies**

| Antibody                               | Clone      | Species | Catalog #   | eBiolegend                | Dilution               |
|----------------------------------------|------------|---------|-------------|---------------------------|------------------------|
| CD44                                   | IM7        | mRt     | 17-0441     | eBiolegend                | 1:100 (FACS)           |
| CD105                                  | MJ7/18     | mRt     | 120415      | eBiolegend                | 1:100 (FACS)           |
| SCA1                                   | D7         | mRt     | 25-5981-82  | eBiolegend                | 1:100 (FACS)           |
| CD45                                   | 30-F11     | mRt     | 25-0451-82  | eBiolegend                | 1:100 (FACS)           |
| CD45                                   | 30-F11     | mRt     | 103108      | eBiolegend                | 1:100 (FACS)           |
| CD34                                   | RAM34      | mRt     | 11-0341-82  | eBioscience               | 1:100 (FACS)           |
| TER119                                 | TER-119    | mRt     | 12-5921-82  | eBioscience               | 1:100 (FACS)           |
| B220                                   | RA3-6B2    | mRt     | 103230      | eBiolegend                | 1:100 (FACS)           |
| CD31                                   | MEC13.3    | mRt     | 11-031-82   | eBiolegend                | 1:100 (FACS)           |
| CD31                                   | MEC13.3    | mRt     | 102515      | eBiolegend                | 1:100 (FACS)           |
| CD3e                                   | 145-2C11   | mHm     | 100320      | eBiolegend                | 1:100 (FACS)           |
| F4/80                                  | BM8        | mRt     | 123128      | eBiolegend                | 1:100 (FACS)           |
| CD11b                                  | M1/70      | mRt     | 11-0112-41  | eBiolegend                | 1:100 (FACS)           |
| TGFβ1                                  | TW4-9E7    | mMs     | 562339      | Invitrogen                | 1:100 (FACS)           |
| p16                                    | N/A        | pRb     | PA1-46220   | Invitrogen                | 1:20 (IF); 1:50 (FACS) |
| gamma-H2AX                             | 2F3        | mMs     | 613415      | eBiolegend                | 1:100 (FACS)           |
| BrdU                                   | Polyclonal | pRb     | 152095      | Abcam                     | 1:400 (IF)             |
| F(ab) fragment anti-mouse<br>IgG (H+L) | N/A        | Goat    | 115-007-003 | Jackson<br>ImmunoResearch | 1:400 (IF)             |
| Gamma-H2AX Ab                          | JBW301     | mMs     | 05-636-l    | Sigma-Aldrich             | 1:250 (IF)             |
| Ki67                                   | N/A        | pRb     | ab15580     | Abcam                     | 1:400 (IF)             |
| TGFβ1                                  | 3C11       | mMs     | sc-130348   | Santa Cruz                | 1:100 (WB)             |
| Actin                                  | Polyclonal | pRb     | A2066       | Sigma-Aldrich             | 1:2000 (WB)            |

# Supplemental table 2

**Supplemental Table 2. Primers used in qPCR**

| Genes                | Sequences of primers               | GenBank accession #            | Annealing Tm (°C) | Product (bp) |
|----------------------|------------------------------------|--------------------------------|-------------------|--------------|
| p16 <sup>Ink4a</sup> | F-5'-CGAACTCTTTCGGTCTGACCC-3'      | <a href="#">NM_001040654.1</a> | 65                | 88           |
| p19 <sup>ARF</sup>   | R-5'-CGAATCTGCACCGTAGTTGAGC-3'     | <a href="#">NM_009877.2</a>    | 63                | 194          |
|                      | F-5'-GTTCTTGGTCACTGTGAGGATT-3'     |                                |                   |              |
| beta-actin           | R-5'-CCATCATCATCATCACCTGGCCAG-3'   | <a href="#">NM_007393.5</a>    | 62                | 124          |
|                      | F-5'-AGATGTGGATCAGCAAGCAG-3'       |                                |                   |              |
| Runx2                | R-5'-GCCAAGTTAGGTTTTGTCA-3'        | <a href="#">NM_001145920.2</a> | 63                | 233          |
|                      | F-5'-CCTGAACCTCTGCACCAAGTC-3'      |                                |                   |              |
| Osx                  | R-5'-GAGGTGGCAGTGTCAATC-3'         | <a href="#">XM_006520519.5</a> | 62                | 123          |
|                      | F-5'-GTCAAGAGTCTTAGCCAACTC-3'      |                                |                   |              |
| Sox9                 | R-5'-AAATGATGTGAGGCCAGATGG-3'      | <a href="#">NM_011448.4</a>    | 63                | 162          |
|                      | F-5'-CGGAACAGACTCACATCTCTCC-3'     |                                |                   |              |
| Col2                 | R-5'-GCTTGCACGTCGGTTTTG-3'         | <a href="#">NM_031163</a>      | 60                | 85           |
|                      | F-5'-GGGTCACAGAGGTTACCCAG-3'       |                                |                   |              |
| Ppar-gamma           | R-5'-ACCAAGGGAACTCTCAC-3'          | <a href="#">XM_036165927.1</a> | 62                | 168          |
|                      | F-5'-GCCCTTTGGTGACTTTATGG-3'       |                                |                   |              |
| Cebpalpa             | R-5'-CAGCAGGTTGTCTTGATGT-3'        | <a href="#">NM_001287514.1</a> | 64                | 123          |
|                      | F-5'-CAAGAACAGCAACGAGTACCCG-3'     |                                |                   |              |
| Tgf beta1            | R-5'-GAGAAGAACTGCTGTGTCG-3'        | <a href="#">XM_036152883.1</a> | 61                | 133          |
|                      | F-5'-GTGTCCAGGCTCCAAATATAG-3'      |                                |                   |              |
| Tgf beta2            | R-5'-TGCCATATGTAGAGTGCCATCA-3'     | <a href="#">NM_009367.4</a>    | 66                | 159          |
|                      | F-5'-CAGGAGTGGCTTACCACAAG-3'       |                                |                   |              |
| Tgf beta3            | R-5'-TCGACATGATCCAGGGACTG-3'       | <a href="#">NM_009368.3</a>    | 64                | 115          |
|                      | F-5'-CCACTGAGGACACATTGAAACG-3'     |                                |                   |              |
| Tnfalpha             | F-5'-AGTAGACAAGGTACAACCCATC-3'     | <a href="#">NM_013693.3</a>    | 61                | 181          |
| IL1alpha             | R-5'-CACACTCAGATCATCTTCTCAA-3'     | <a href="#">NM_000576.3</a>    | 64                | 131          |
|                      | F-5'-ATGATGGCTTATTACAGTGGCAA-3'    |                                |                   |              |
| IL6                  | R-5'-GTCCGAGATTTCGTAGCTGGA-3'      | <a href="#">NM_001314054.1</a> | 60                | 158          |
|                      | F-5'-AGTTGCCCTTCTGGGACTGA-3'       |                                |                   |              |
| IL10                 | R-5'-TCCACGATTTCCAGAGAAC-3'        | <a href="#">NM_008607.2</a>    | 61                | 144          |
|                      | F-5'-CTATCCCTTGATGCCATTACCAG-3'    |                                |                   |              |
| Csf1                 | R-5'-ATCCACATGGTTGGGAAGTTCC-3'     | <a href="#">XM_036162880.1</a> | 63                | 207          |
|                      | F-5'-TGTCTGTCCACAAGCTCTGG-3'       |                                |                   |              |
| Cxcl1                | R-5'-AGGGCATCAGAACAAGTTGG-3'       | <a href="#">NM_008176.3</a>    | 66                | 77           |
|                      | F-5'-GCTTGAAGGTGTTGCCCTCAG-3'      |                                |                   |              |
| Cxcl2                | R-5'-AAGCTCGCGACCATTCTTG-3'        | <a href="#">NM_009140.2</a>    | 65                | 136          |
|                      | F-5'-GCGCTGTCAATGCCTGAAGA-3'       |                                |                   |              |
| Cxcl12               | R-5'-TTTGACCGCCCTTGAGAGTG-3'       | <a href="#">NM_199168.4</a>    | 62                | 220          |
|                      | F-5'-ATGAACGCCAAGGTCGTG-3'         |                                |                   |              |
| Ccl3                 | R-5'-CTTTAGCTTCGGGTCAATGC-3'       | <a href="#">NM_011337.2</a>    | 67                | 124          |
|                      | F-5'-TGAAACCAGCAGCCCTTTGCTC-3'     |                                |                   |              |
| Ccl5                 | R-5'-AGGCATTGAGTCCAGGTCAGTG-3'     | <a href="#">NM_013653.3</a>    | 65                | 62           |
|                      | F-5'-GACACCACACCCTGCTGCT-3'        |                                |                   |              |
| Ccl7                 | R-5'-TACTCCTTGATGTGGGCAG-3'        | <a href="#">NM_013654.3</a>    | 66                | 563          |
|                      | F-5'-ACGCTTCTGTGCCTGCTGCTCATAG-3'  |                                |                   |              |
| Ccl8                 | R-5'-GTAAAAATGGGAAAGGGGAGAAT-3'    | <a href="#">NM_021443.3</a>    | 70                | 388          |
|                      | F-5'-AGTGCTTCTTTGCCTGCTGCTCATAG-3' |                                |                   |              |
| Mmp9                 | R-5'-ATGAGAAAACACGCAGCCAGGCACC-3'  | <a href="#">NM_013599.4</a>    | 61                | 146          |
|                      | F-5'-CCATGCACTGGGCTTAGATCA-3'      |                                |                   |              |
| Mmp12                | R-5'-GGCCTTGGGTCAGGCTTAGA-3'       | <a href="#">NM_001320077.1</a> | 62                | 197          |
|                      | F-5'-TTTCTTCCATATGGCCAAGC-3'       |                                |                   |              |
| Mmp13                | R-5'-GGTCAAAGACAGTGCATCA-3'        | <a href="#">NM_008607.2</a>    | 62                | 74           |
|                      | F-5'-CGGGAC61ATCCTGAAGAAGTCTACA    |                                |                   |              |
| Vegf alpha           | R-5'-CTAAGCCAAAGAAAGATTGCATTTCC-3' | <a href="#">NM_001110267.1</a> | 64                | 104          |
|                      | F-5'-GCACATAGAGAGAATGAGCTTCC-3'    |                                |                   |              |
| Alp                  | R-5'-CTCCGCTCTGAACAAGGCT-3'        | <a href="#">XM_006538498.4</a> | 56                | 157          |
|                      | F-5'-CGGACTGGTACTCGGATAA-3'        |                                |                   |              |
| Trap                 | R-5'-ATTCCACGTCGGTTCTGTTC-3'       | <a href="#">XM_006509946.3</a> | 63                | 212          |
|                      | F-5'-TCCTGGCTCAAAAAGCAGTT-3'       |                                |                   |              |
| Ctsk                 | R-5'-ACATAGCCCACACCGTTCTC-3'       | <a href="#">NM_007802.4</a>    | 63                | 167          |
|                      | F-5'-CAGCTTCCCAAGATGTGAT-3'        |                                |                   |              |
|                      | R-5'-GAAGCACCAACGAGAGAGA-3'        |                                |                   |              |
